# Supplementary material
Source: HighWire-hosted journal article supplement (https://bmjopenquality.bmj.com/highwire/filestream/136058/field_highwire_adjunct_files/0/ds1709.docx)
Supplement: ds1709.docx [file ds1709.docx]

Figure 1: 7 Domains of the London Deanery Professional Development Framework (London Deanery, 2012)

| **London Deanery PDF Framework** |
| --- |
| 1. Ensuring safe and effective patient care through training |
| 1. Establishing and maintaining an environment for learning |
| 1. Teaching and facilitating learning |
| 1. Enhancing learning through   assessment |
| 1. Supporting and monitoring   educational progress |
| 1. Guiding personal and professional development |
| 1. Continuing professional development as an educator |

Figure 2: T4 stakeholder map

Figure 3: T4 Module Programme Design

| **Level** | **T4 Module Programme** | **Target** |
| --- | --- | --- |
| Level 1: Introduction | Module 1 | All clinical and educational supervisors and senior trainees |
| Module 2 | All clinical and educational supervisors and senior trainees |
| Level 2: Advanced | Module 3 | Named clinical supervisors and educational supervisors; |
| Module 4 | Named clinical supervisors and educational supervisors |
| Level 3: Mastery | Topic workshops | Experienced and aspiring educational leads, tutors, Training Programme Directors, Directors of Medical Education |

Figure 4: T4 Attendance May 2012 – March 2013 Figure 5: T4 Attendance by Specialty Cluster
